1           **Mechanical challenges to freshwater residency in sharks**  
2                                   **and rays**

3  
4  
5  
6           **Adrian C. Gleiss<sup>1,2\*</sup>, Jean Potvin<sup>3</sup>, James J. Keleher<sup>1</sup>, Jeff M.**  
7           **Whitty<sup>1</sup>, David L. Morgan<sup>1</sup>, Jeremy A. Goldbogen<sup>2</sup>**

8  
9           <sup>1</sup>Freshwater Fish Group & Fish Health Unit, School of Veterinary & Life Sciences, Murdoch  
10          University, 90 South Street, Murdoch, Western Australia 6150, Australia

11          <sup>2</sup>Hopkins Marine Station, Stanford University, Pacific Grove, CA 93950, USA

12          <sup>3</sup>Department of Physics, Saint Louis University, St. Louis, MO, 63103, USA

13  
14          \*author for correspondence: [agleiss@stanford.edu](mailto:agleiss@stanford.edu)

15  
16  
17  
18  
19                           **Running head: Mechanical challenges to freshwater residency**

## 50 **Summary**

51 Major transitions between marine and freshwater habitats are relatively infrequent, primarily  
52 as a result of major physiological and ecological challenges. Few species of cartilaginous fish  
53 have evolved to occupy freshwater habitats. Current thought suggests that the metabolic  
54 physiology of sharks has remained a barrier to the diversification of this taxon in freshwater  
55 ecosystems. Here we demonstrate that the physical properties of freshwater provide an  
56 additional constraint for this specious group to occupy freshwater systems. Using  
57 hydromechanical modelling, we show that occurrence in freshwater results in two- to three-  
58 fold increase in negative buoyancy for sharks and rays. This carries the energetic cost of lift  
59 production and results in buoyancy dependant mechanical power requirements of swimming  
60 and increase optimal swim speeds. The primary source of buoyancy, the lipid-rich liver,  
61 offers only limited compensation for increased negative buoyancy as a result of decreasing  
62 water density; maintaining the same submerged weight would involve increasing the liver  
63 volume by very large amounts, namely, 3 to 4 fold in scenarios where liver density is also  
64 reduced to currently observed minimal levels, and 8 fold without any changes in liver density.  
65 The first data on body density from two species of elasmobranch occurring in freshwater  
66 (bull shark *Carcharhinus leucas* and largetooth sawfish *Pristis pristis*) support this  
67 hypothesis, showing similar liver sizes as marine forms but lower liver densities, but the  
68 greatest negative buoyancies of any elasmobranch studied to date. Our data suggests that  
69 mechanical challenges associated with buoyancy control may have hampered the invasion of  
70 freshwater habitats in elasmobranchs, highlighting an additional key factor that may govern  
71 the predisposition of marine organism to successfully establish in freshwater habitats.

72

73 **Keywords:** Buoyancy, liver, tissue density, locomotion, lift, drag

74

## 75 **Introduction**

76 A wide range of physiological, ecological, and evolutionary processes determine the capacity  
77 of animals to invade and adapt to novel environments. For major transitions, such as those  
78 between aquatic and terrestrial or marine and fresh water environments, successful invasions  
79 are relatively infrequent in most plant and animal taxa except for tetrapods (Vermeij and  
80 Dudley, 2000). However, transitions from saltwater to freshwater habitats can facilitate  
81 radiation and speciation events, which in some systems manifest as rapid and repeated  
82 invasions worldwide (Lee and Bell, 1999). The Chondrichthyes have proven relatively  
83 unsuccessful at invading freshwater habitats despite their worldwide distribution in marine  
84 ecosystems. Of the >1000 species of the Elasmobranchii, only approximately 5% are thought  
85 to reside in freshwater (Ballantyne and Fraser, 2013; Martin, 2005). Moreover, most of these  
86 species only utilise freshwater habitats for part of their lifecycle. Explaining the mechanism  
87 behind this stark pattern in biogeography has received significant attention in the literature  
88 for the last half century (e.g. Ballantyne and Robinson, 2010; Ballantyne and Fraser, 2013;  
89 Pillans and Franklin, 2004; Thorson, 1962).

90  
91 Current hypotheses suggest that metabolic organisation of elasmobranchs is responsible for  
92 their poor penetration into freshwater, resulting in metabolic costs associated with  
93 osmoregulation (Ballantyne and Robinson, 2010; Meloni et al., 2002). Whereas the  
94 difference in solute concentrations has a significant impact on the physiological biochemistry  
95 of elasmobranchs, the potential impact of the changing density of seawater and freshwater  
96 has not been adequately considered. Although the difference in density between seawater  
97 (SW  $\sim 1026 \text{ kg m}^{-3}$  at  $20\text{C}^\circ$ ) and freshwater (FW  $\sim 996 \text{ kg m}^{-3}$  at  $20\text{C}^\circ$ ) may seem trivial, it  
98 may nevertheless have significant ramifications for the buoyancy control of these animals.  
99 Animal tissue is generally denser than both SW and FW, so that marine animals without any

100 organ providing buoyancy would be heavily negatively buoyant (Alexander, 1990;  
101 Davenport, 1999; Pelster, 2009). Elasmobranchs utilise lipid-rich livers to increase the  
102 buoyant force relative to their mass (commonly referred to as static lift) (Baldrige Jr, 1970;  
103 Bone and Roberts, 1969; Corner et al., 1969). Due to the minor difference in density of liver  
104 tissue ( $900 - 1000 \text{ kg m}^{-3}$ ) to that of marine waters ( $\sim 1027 \text{ kg m}^{-3}$ ), large livers are required to  
105 provide necessary force to approach near neutral buoyancy. Indeed, neutrally buoyant sharks,  
106 which are commonly found in the deep sea may have livers which comprise 30% of whole  
107 body volume (Corner et al., 1969) compared to only 1-7% swim-bladder volume required to  
108 provide neutral buoyancy in ray-finned fishes (Alexander, 1966; Davenport, 1999; Weitkamp,  
109 2008).

110

111 Despite the use of the liver as a means to increase buoyancy, the majority of elasmobranch  
112 species remain negatively buoyant (Baldrige Jr, 1970; Bone and Roberts, 1969; Gleiss et al.,  
113 2011b). Counteracting this negative buoyancy represents one of the two major forces that  
114 govern the energetics of locomotion in aquatic environments (Alexander, 1990; Alexander,  
115 2003). In elasmobranchs, the heterocercal caudal fin and the pectoral fins and/or the body  
116 generate vertical forces that balance this negative buoyancy (Fish and Shannahan, 2000;  
117 Wilga and Lauder, 2002). This in turn results in drag due to lift by the body and pectoral fins  
118 (known as induced drag, Alexander, 1990; Alexander, 2003) and the vortex jet of the  
119 heterocercal caudal fin to have a vertical component (Wilga and Lauder, 2002) making  
120 excessive negative buoyancy unfavourable. The use of a buoyancy organ, such as a large  
121 lipid rich liver, reduces this cost, but increases parasite drag, due to greater surface area and  
122 reduced streamlining (Alexander, 1990). Negative buoyancy is favourable for those animals  
123 travelling fast while neutral buoyancy provided by large livers favours lower travel speeds, as  
124 a result of decreasing costs of lift production at higher speeds (Alexander, 1990). For

125 instance, Greenland sharks (*Somniosus microcephalus*) have substantial liver sizes and are  
126 close to neutral buoyancy cruise at speeds of only 0.1 lengths/s (Watanabe et al., 2012). In  
127 contrast, sharks that are more negatively buoyant tend to travel at 0.2-0.7 lengths/s (Watanabe  
128 et al., 2012).

129

130 The close relationship between the locomotor performance and body density may represent a  
131 fundamental influence on the lifestyle of elasmobranchs (Bone and Roberts, 1969; Gleiss et  
132 al., 2011a) and a key aspect to understanding how the constraints of water density and  
133 buoyancy shape the lives of those species that occur in freshwater. However, this has  
134 received no attention in the literature thus far (Ballantyne and Robinson, 2010). In this paper,  
135 we aim to clarify the impacts of changing water density on the buoyancy and energetics of  
136 elasmobranchs. We model the expected change in buoyancy by calculating the theoretical  
137 buoyancies of marine species of shark occurring in freshwater. We then simulate the required  
138 change in liver size and density to compensate for the decrease in environmental density and  
139 calculate the energetic costs associated with different hypothetical scenarios of compensation.  
140 In a second part of this work, we present the first measurements of buoyancy of two species  
141 of elasmobranchs naturally occurring in freshwater and compare those to marine forms.

142

## 143 **Results**

### 144 *Modelling the Morphological Implications of Water Density*

145 Changes in water density drastically alter the submerged weight of an elasmobranch, in this  
146 case our modelled bull shark (Fig. 1), as calculated by eq. 1 described in *Materials and*  
147 *Method*. Submerged weight increases linearly with a decline of water density. A reduction of  
148 liver density to the low values observed in deep-sea sharks ( $920 \text{ kg m}^{-3}$ ) can off-set this  
149 increase to brackish waters of density of  $1022 \text{ kg m}^{-3}$  (Fig. 1). An additional mode of

150 compensating for the reduced environmental density is to change the size of the liver, with  
151 larger livers providing more upthrust. Assuming no adjustments in liver density, liver volume  
152 would have to increase 8-fold to maintain a similar submerged weight in freshwater as in  
153 marine waters (Fig. 1), resulting in a liver comprising ~60% of whole body volume. In the  
154 hypothetical scenario where a shark has the ability to reduce its liver density, liver volume  
155 would only have to increase 3-fold, resulting in a liver comprising ~35% of body volume,  
156 compared to 14% in marine waters to achieve the same submerged weight as in marine  
157 waters. We have to note here that these calculations assume that all other tissues maintain the  
158 same volume. This assumption is discussed below.

### 159 **Fig. 1**

160

#### 161 *Modelling the Energetic Consequences of Salinity*

162 Negative buoyancy compensation via lift production by the body, pectoral fins and  
163 heterocercal tail, and attendant metabolic costs, was carried out using a standard approach to  
164 aircraft performance modelling - see eqns. 2 – 6a in *Materials and Methods* (Cole 1981, Pope  
165 1951). Components of this model were validated with the shear stress drag data of smooth  
166 dogfish (*Mustelus canis*) measured by Anderson et al (2001) (further discussed in the  
167 Electronic Supplement). Swimming performance is assessed herein with the expended  
168 metabolic power ( $P_{total}$ ) and Cost of Transport (COT) incurred from (parasite) drag  
169 production and from negative buoyancy compensation via lift (see eqns. 6a and 7). Herein  
170 these metabolic costs are based on two representative swim speeds, namely, the so-called  
171 *minimum speed* ( $u_{min}$ ) used to minimize total drag (eqn. 5); and the optimal speed ( $u_{opt}$ )  
172 maximizing travel distance with a fixed energy store (Weihs, 1973). Teleosts and  
173 elasmobranchs also travel over long distance in manners to reduce energy consumption. But  
174 biological organisms incur metabolic costs at  $u = 0$  (known as Standard Metabolic Rate)

175 resulting from the other energy intensive functions of the body; this cost demands that  
176 metabolic efficiency is achieved at higher velocities than  $u_{min}$  – hence the larger  $u_{opt}$ .  
177 Typically, sharks swim at average speeds in the range of 0.3 - 0.8m/s (Watanabe et al 2012) -  
178 presumably near optimal speed – which amounts to twice (or less) the minimal speed (as  
179 shown further here). Not surprisingly, both minimal and optimal speeds, and corresponding  
180 metabolic costs, increase with larger negative buoyancies (see eqns. 6a and 6b). This trend  
181 will be shown quantitatively here using  $u_{min}$  since it can be assessed with a minimum of  
182 assumptions. Given that the calculation of  $u_{opt}$  involves several inputs characteristic of  
183 metabolism, which predictably vary between species and encountered temperature, the  
184 dependence of optimal speed and metabolic expenditures shall be shown algebraically rather  
185 than numerically (see eqn. 6b below, and eqns. ES13-ES20 in the Electronic Supplement).  
186 Note finally that other optimized swimming speed concepts have been proposed (e.g. Castro-  
187 Santos, 2006; Videler and Nolet, 1990; Ware, 1978). Although optimizing different metrics,  
188 most, if not all, should show similar trends with regards to adding more negative buoyancy,  
189 due to the increasing mechanical cost associated with a given speed.

190

191 We simulated four hypothetical scenarios that could be a response to changing water  
192 density; no compensation, increasing liver size, decreasing liver density and the two  
193 combined. These four scenarios markedly differed in the parameters used in our modelling  
194 exercise (Table 1) and resulted in an increase of negative buoyancy compared to marine  
195 waters. The scenarios do not encompass all possible morphological adaptations, such as body  
196 and fin profiles to improve lift (of which an evolution into a ray-like lifting body profile  
197 would be one example). They aim instead at evaluating the effects of liver density and size  
198 modifications separately from those leading specifically to lift enhancement. Although the  
199 latter wasn't considered here, it should be clear from the modelling that, despite possible

200 reductions in parasitic drag, lift increase always come at a cost, either in extra induced drag  
 201 and/or loss of turn rate performance in unsteady manoeuvring. All scenarios resulted in an  
 202 increase of negative buoyancy compared to marine waters. We found a marked increase of  
 203 the speed at which drag is minimised, primarily as a result of the increased negative  
 204 buoyancy of those scenarios (Fig. 2).

205

206 An increase in liver size and a decreasing liver density resulted in the smallest increase of  
 207 either cost of transport or metabolic power at minimum cost speed ( $u_{min}$ ), but also resulted in  
 208 less streamlining, with lower body depth over body length ratio ( $t/SL$ ) and body wetted area  
 209 both increased by 13% (Fig. 3). Our numerical work to solve  $u_{opt}$  also showed that optimal  
 210 speed is dependent on buoyancy and mechanical power requirements increase with increasing  
 211 negative buoyancy (see Methods and Electronic Supplement). Namely, both  $u_{opt}$  and  $P_{total}$   
 212 increase with negative buoyancy ( $W$ ) as  $u_{opt} \propto W^0$  &  $u_{opt} \propto W^{1/2}$  at small and large negative  
 213 buoyancy respectively, which, interestingly, compares with  $u_{min}$  as  $u_{min} \propto W^{1/2}$  (eqn. 5); and  
 214  $P_{total}^{opt} \propto W^2$  &  $P_{total}^{opt} \propto W$  again at small and large  $W$ .

215

## 216 **Table 1**

217

## 218 **Fig. 2, 3**

### 219 *Densities of freshwater elasmobranchs*

220 All sawfish (n=17) and bull sharks (n= 5) captured in the Fitzroy River were negatively  
 221 buoyant in the water they were captured in, with calculated body densities of  $1065 \pm 5 \text{ kg m}^{-3}$   
 222 for the bull sharks and  $1065 \pm 3 \text{ kg m}^{-3}$  for the sawfish. The ratio of  $W_{sub}$  and weight in air  
 223  $W_{Air}$  ( $\text{Mass} \times 9.81 \text{ m/s}^2$ ) was  $6.44 \pm 0.39\%$  in bull sharks and  $6.48 \pm 0.33\%$  in sawfish. For  
 224 the individuals where liver size and density could be measured, the liver represented  $6.21 \pm$



225 0.64 % of whole body mass in the sawfish (n=2) and  $7.82 \pm 1.73$  % in the bull shark (n=3).  
226 Liver density was  $980 \pm 2$  kg m<sup>-3</sup> in the sawfish and  $920 \pm 3$  kg m<sup>-3</sup> in the bull sharks (Table  
227 3).

228

#### 229 *Comparative Data*

230 Comparisons of the ratio between weight in air and submerged weight shows that the 22  
231 individuals of the two species we studied show some of the greatest negative buoyancies (6.4  
232 %), compared to the 113 individuals sampled in other studies in marine waters ( $3.95 \pm 1.2$  %,  
233 see supplementary Table ES1). Our statistical model of mass and submerged weight supports  
234 this, with the most parsimonious model indicating that habitat and mass are the strongest  
235 predictors of submerged weight (Table 4, Fig. 4). The comparison of liver size scaling  
236 between elasmobranchs sampled in marine waters from previous research and those sampled  
237 in freshwater revealed that there was little difference in the size of livers, with the highest  
238 ranked model only including logMass as an explanatory factor. Lifestyle did not appear to  
239 affect liver size in our data-set; this however is a result of excluding deep-water sharks from  
240 our analysis, which are known to have large livers (Bone and Roberts, 1969; Corner et al.,  
241 1969). Liver density on the other hand is best predicted by the inclusion of lifestyle and  
242 habitat. Pelagic sharks have livers of lesser density than those species that are generally  
243 associated with the seabed. The five individuals for which livers could be sampled showed  
244 liver densities that were below or near the lower 95<sup>th</sup> percentile of individuals of similar  
245 lifestyle sampled in marine waters (Fig. 4). Density of lean tissue was not predicted well by  
246 any of the covariates we tested the model for (Table 4).

247

248 **Table 4**

249 **Fig. 4**

250

251 **Discussion**

252 Our comparison of body composition of sharks sampled in marine waters and those in  
253 freshwater suggest that liver size has not drastically increased to produce more upthrust and  
254 compensate for the lower density of freshwater. Liver density on the other hand was  
255 measured to be close to the lowest values observed in any species of shark, suggesting that  
256 this may be a response to reduced water density. We emphasize, however, that these  
257 conclusions do not stem from experimental data of how liver size and density responded to  
258 changing salinity in a controlled experiment, but rather a large comparative analysis of liver  
259 sizes and densities of a range of species. We can, however, safely say that no substantial  
260 increase in liver size appears to have occurred in the individuals we studied. The same caveat  
261 also applies to our assessment of liver density; however in this case, the liver densities were  
262 lower than the 95<sup>th</sup> percentile of those studied to date, indicating that liver density may be  
263 readily lowered. There is precedence for such a process in the literature – experimentally  
264 weighted spiny dogfish (*Squalus acanthias*) increase their fraction of DAGE (a low density  
265 lipid) in liver tissue (Malins and Barone, 1970). Although not explicitly quantified in their  
266 study, greater amount of DAGE will increase the upthrust provided by the liver and  
267 compensate for the increased negative buoyancy. No change in liver size was found in the  
268 experimentally weighted spiny dogfish.

269

270 Our analysis makes one important assumption; we have assumed that all lean tissue is fixed  
271 in its volume. A reduction in the volume of dense tissue (e.g. muscle, viscera, skeleton),  
272 would reduce any increases in surface area and therefore the energetic consequences we  
273 outline here. However, any reduction in the volume of these tissues must invariably decrease  
274 some form of performance. For instance, a reduction of white muscle volume (the most

275 voluminous tissue in most fish) would be expected to lead to a proportional decline in burst  
276 swimming performance. A simple example, for a shark to maintain similar hydrodynamic  
277 characteristics (fineness ratio, buoyancy, wetted area, Table 1) the liver would have to occupy  
278 ~45% of the whole fish, reducing lean tissue volume by >50% in freshwater. Assuming white  
279 muscle comprises 70-40% of the animals volume (Bone, 1978; Greek-Walker and Pull,  
280 1975), this would result in a 76 - 100% reduction in available white muscle for burst  
281 swimming, with obvious deleterious effects to fitness (Ghalambor et al., 2003; Walker et al.,  
282 2005). Even though it may be possible to maintain similar hydrodynamic properties,  
283 compensation by reduction of volume of other tissue should have additional deleterious  
284 effects.

285

#### 286 *Optimal compensation – a paradox?*

287 Our field data indicate that the reduction of liver density is the prevalent mechanism by  
288 which sharks achieve more upthrust. Yet our modelling approach suggests that in addition to  
289 decreasing liver density, increasing liver size to 30% body volume (Scenario 4) provides a  
290 more efficient alternative in our hypothetical shark (see Fig. 2), due to the reduced negative  
291 buoyancy. However, increasing liver size will increase body fineness ratio ( $t/SL$ ), and thus  
292 wetted area (by ~13%), as well as parasitic drag force (by >25%, see eqn. 2, 3); but  
293 interestingly it would also *decrease*  $u_{min}$  (by ~ 18%; see eqn. 5) and overall COT (Figure 2)  
294 compared to the scenario lacking compensation. However, less streamlining by increased  
295 liver volume would also degrade the performance of burst swimming as well as of foraging at  
296 supra-optimal speeds [44] since, with  $u > u_{min}$ , the resulting drag force would become even  
297 higher and to the point of *increasing* COT, perhaps at levels too high for the given fixed  
298 amount of muscle power and energy available. In other words, combining lower liver

299 densities with larger liver volumes could only be advantageous in environments where the  
300 prey is easy to find and catch (at  $u_{min}$ ) and predation pressure is low.

301

302 An additional explanation for this discrepancy is the metabolic cost of growing and  
303 maintaining such large livers. The low-density lipids contained in the liver responsible for  
304 providing upthrust are energy dense. For instance, triacylglycerols, a class of lipid found in  
305 shark livers (Wetherbee and Nichols, 2000), contains  $38 \text{ kJ g}^{-1}$  whereas muscle tissue  
306 contains approximately  $2\text{-}4 \text{ kJ g}^{-1}$ . This may make a substantial difference for the juvenile  
307 sharks studied here, which are in a period of rapid somatic growth. Indeed, Priede et al.  
308 (2006) have suggested that the metabolic cost associated with large livers may be responsible  
309 for the absence of sharks from the oligotrophic abyssal depths of the oceans. Moreover, liver  
310 tissue has some of the fastest turnover time of any tissue in elasmobranchs (Hussey et al.,  
311 2010), therefore increasing the cost of not only growing but also maintaining such tissue.  
312 Although it may be argued that  $\sim 30\%$  liver volume is encountered in deep-sea sharks and  
313 some very large pelagics (e.g. basking, tiger or white sharks) and is therefore unlikely to  
314 provide an overwhelming metabolic burden, the warm tropical waters occupied by our study  
315 subjects already significantly increase standard metabolic rates (Carlson and Parsons, 1999).  
316 The increasing metabolic cost of growing a large liver may therefore not be sustainable for  
317 juvenile elasmobranchs in tropical waters.

318

### 319 *Ecological Implications*

320 Activity represents an important component of the energy balance of most fish (Boisclair and  
321 Leggett, 1989) and our results indicate that greater negative buoyancies will result in  
322 increased costs, as shown by our modelled increases in  $u_{min}$  and  $u_{opt}$ . Such behavioural  
323 modification will increase the energetic cost of locomotion because such power costs increase

324 with swimming speed at exponents of 2-3 (Alexander, 2003; Lowe, 2001). Our results  
325 confirmed that despite some compensation by liver density, the negative buoyancies of the  
326 two species we studied are approximately twice as great as those of a typical marine  
327 elasmobranch of similar mass and lifestyle. At  $u_{min}$  the power required to swim is  
328 approximately doubled compared to marine water. At  $u_{opt}$ , on the other hand, the power  
329 would be expected to increase by as much, if not more, depending on the value of  $GW^2/\beta$ .  
330 The increased activity costs will depend on a variety of species-specific factors including the  
331 ecology of the species, typical swimming speeds, and the amount of time spent resting on the  
332 bottom.

333

### 334 *Evolutionary Implications*

335 Increasing costs of locomotion associated with freshwater residency itself does not preclude  
336 elasmobranchs from occupying freshwater habitats, but it may act as a constraint. Teleost fish  
337 often compete for the same ecological space with elasmobranchs, but the utility of a gas  
338 bladder as a source of upthrust largely negates the buoyancy problem faced by sharks and  
339 rays. Juvenile coho salmon (*Oncorhynchus kisutch*) collected along a salinity gradient display  
340 compensation in swim-bladder volume; in marine waters a bladder comprising 5% of whole  
341 body volume is adequate to provide near neutral buoyancy and in freshwater this volume only  
342 increases to 7% (Weitkamp, 2008). This difference is unlikely to affect parasite drag, as  
343 surface area and fineness ratio will remain largely unchanged (Alexander, 1966). Indeed, the  
344 extraordinarily low density of air ( $\sim 5 \text{ kg m}^{-3}$  at 10 m depth at  $25 \text{ C}^\circ$ ) compared to that of  
345 lipid ( $\sim 900 \text{ kg m}^{-3}$ ), results in water density not having a great effect on upthrust provided in  
346 fish using gas filled bladders. This suggests that elasmobranchs (and by extension all fish  
347 that utilise lipid only to provide upthrust) are disadvantaged in freshwater over those using  
348 gas.

349

350 Paleontological records also show that early elasmobranchs were not always scarce in  
351 freshwater, but dominated marine and freshwater environments by the late Devonian, ~400  
352 million years ago, whereas ray-finned fishes only evolved into efficient swimmers in the  
353 Mesozoic, approximately 200 million years ago (Long, 1995). We therefore argue that the  
354 innovations by modern teleosts, the gas-bladder and its role in buoyancy control in particular,  
355 have resulted in a competitive edge over elasmobranchs and contributed to the contemporary  
356 low abundance and diversity of freshwater sharks and rays. The material constraints of tissues  
357 providing lift in elasmobranchs will inevitably result in greater negative buoyancies in  
358 freshwater and result in lower locomotory performance compared to those groups able to use  
359 gas. This effect can be somewhat offset, however, it appears that sharks are unable to escape  
360 the constraints of lipid-produced upthrust.

361

362 The patterns of diversity in freshwater elasmobranchs also supports our conclusions; ~76 -  
363 84% of all elasmobranchs known to occupy freshwater are part of the order Myliobatiformes  
364 (Ballantyne and Fraser, 2013; Martin, 2005). Myliobatiforms are a group of largely benthic  
365 rays, such as whiptails (*Himantura* spp.) and stingrays (*Dasyatis* spp.). Individuals within this  
366 group are largely confined to movement close the substratum (with some exceptions) and  
367 often occur over flat sandy or muddy substrates. The costs of increased negative buoyancy  
368 would be drastically reduced in those species, due to benthic resting and the majority of  
369 swimming being performed close to the substrate. Swimming close to the bottom reduces the  
370 induced drag by a lifting surface as a result of increased pressure forming on the ventral side  
371 of the lifting surface, known as the ground effect (Webb, 1988). Indeed, in gliding bird flight,  
372 the ground effect may be responsible for a 49% reduction of drag due to lift (Hainsworth,

373 1988). The generally higher density of liver tissue in benthic elasmobranchs supports this, as  
374 there is less of an energetic incentive to reduce submerged weight in this group.

375

376 Our paper is the first to demonstrate that the reduced density of freshwater represents a  
377 significant physical challenge for elasmobranch locomotion that manifests as greatly  
378 increased negative buoyancy. These results indicate that freshwater sharks partially  
379 compensate with lower density liver tissue, rather than increasing overall liver volume. Given  
380 these data, elasmobranchs in freshwater habitats experience significant negative buoyancy  
381 and can only compensate by generating more lift through forward locomotion. Such  
382 behavioural compensation will result in greater energy expenditure from increased drag and  
383 we argue that buoyancy may have been an important factor constraining the reinvasion of  
384 freshwater by sharks and their relatives that may act in concert with osmoregulatory  
385 challenges. Additional data on the organismal biology of elasmobranchs occupying salinity  
386 gradients as well as paleontological records will be necessary to test these competing, but not  
387 mutually exclusive hypotheses.

388

## 389 **Methods**

### 390 **Modelling the morphological consequences of environmental density**

391 The following section largely follows the arguments by Alexander (Alexander, 1990), who  
392 tested the optimal means of producing lift as a function of swimming speed. Our model is  
393 constrained to a single means of producing increased buoyant force (liver lipid), while  
394 considering the implications of changing density of the occupied medium. The primary  
395 source of increasing the buoyant force in elasmobranchs is the liver, which is characteristic of  
396 lower density ( $\sim 900 - 1000 \text{ kg m}^{-3}$ ) than other tissues of a shark ( $\sim 1070 \text{ kg m}^{-3}$ ), the ratio of

397 liver-tissue to non-liver tissue is a major determinant of the buoyancy of a shark. According  
 398 to Archimedes,

399

$$400 \quad W = ((V_{\text{Lean}} \rho_{\text{Lean}} + V_{\text{Liver}} \rho_{\text{Liver}}) - (V_{\text{Lean}} + V_{\text{Liver}}) \rho_{\text{Water}}) g \quad \text{eqn. 1}$$

401 where  $W$  refers to the submerged weight (or negative buoyancy) and  $g$  to the acceleration of  
 402 gravity ( $9.81 \text{ m/s}^2$ ). Moreover,  $V_{\text{Lean}}$  and  $V_{\text{Liver}}$  are the volume of lean and liver tissue  
 403 respectively and  $\rho_{\text{Lean}}$  and  $\rho_{\text{Liver}}$  are their respective densities. Thus the overall volume and  
 404 density of the shark are given by  $V_{\text{Shark}} = V_{\text{Lean}} + V_{\text{Liver}}$  and  $\rho_{\text{Shark}} = (V_{\text{Lean}} \rho_{\text{Lean}} + V_{\text{Liver}}$   
 405  $\rho_{\text{Liver}})/V_{\text{shark}}$ , respectively.

406

407 Here we define lean tissue to be all tissue excluding the liver. This set of equations in turn  
 408 permits us to estimate the physical consequences of changing water density, i.e. changing  
 409  $\rho_{\text{Water}}$  to  $996 \text{ kg m}^{-3}$ , representing the density of freshwater at  $28 \text{ }^\circ\text{C}$  compared to  $1026 \text{ kg m}^{-3}$   
 410 of marine water on submerged weight and the liver size required to off-set the reduced  
 411 upthrust provided by the environment. These two phenomena were also investigated under  
 412 the assumption that sharks could alter the density of their livers, which has been  
 413 experimentally shown for *Squalus acanthias* (Malins and Barone, 1970). A low value for  
 414 liver density was taken to be  $920 \text{ kg m}^{-3}$ , representing the livers of deep-sea sharks (Bone and  
 415 Roberts, 1969; Corner et al., 1969) as these animals must face similar constraints in reducing  
 416 their submerged weight, while presumably minimizing liver size.

417

#### 418 **Modelling the energetic consequences of changing water density**

419 We investigated, from first principles, the energetic consequences of a hypothetical shark  
 420 moving into freshwater, and considered a range of mechanisms that could be employed to  
 421 compensate for the decreasing water density as compared to the marine conditions. Changing



422 buoyancy impacts the attendant metabolic expenditures given the changes in swimming  
 423 speed, as well as in body lift and drag, which are required to maintain a level trajectory. Such  
 424 changes are being assessed herein with the type of aerodynamic modelling that is common in  
 425 aircraft design (Dole, 1981; Pope, 1951). The basics of this modelling, along with the most  
 426 important results will be discussed in this section, and the mathematical details further  
 427 explored in the Appendix and Electronic Supplement (ES1).

428

429 Although the inclusion of low-density lipids in the liver reduces negative buoyancy,  
 430 hydrostatic forces are not sufficient to achieve neutral buoyancy in most species. In  
 431 elasmobranchs (and many other obligate swimmers) this is achieved through forward motion-  
 432 generated lift, which in turns increases drag. Swimmers face two general (physical) energetic  
 433 costs incurred by moving through their environment, namely, those related to *parasite* drag  
 434 ( $F_D^{parasite}$ ), as generated by the fluid's friction against the body, as well as from the low  
 435 pressure of the wake turbulence behind the body; and to *induced* drag ( $F_D^{induced}$ ), as created  
 436 by the lift production arising from the upward-angling of the anterior portion of the body and  
 437 pectoral fins, and also from the downward thrust component created by the asymmetric  
 438 caudal tail. For leopard shark (*Triakis semifasciata*) the balance of lift production is estimated  
 439 at approximately 45% from the pectoral fins and 55% from the caudal fin (Fish and  
 440 Shannahan, 2000), and we note that these values represent the only force balance estimates  
 441 for dynamic equilibrium in sharks.

442

443 Parasite drag applied to a shark moving at speed  $u$  can be generally calculated as

444

$$445 \quad F_D^{parasite} = \frac{1}{2} \rho_{water} u^2 \cdot SA \cdot C_D^{parasite} \quad \text{eqn. 2}$$

446

447 Here SA is the reference surface area used when extracting the parasite drag coefficient

448 ( $C_D^{parasite}$ ) from experimental data (usually, by inverting eqn. 2). In comparative

449 biomechanics SA is the body wetted area, approximated here as two joined paraboloids,

450 namely  $SA = 0.71(\text{girth} \times \text{pre-caudal length})$ , as further discussed in the Electronic

451 Supplement (ES1, eqn. ES.5). On the other hand, the parasite drag coefficient is modelled as

452 the sum of the parasite drag (i.e., friction plus pressure drag) arising separately from the body

453 and from all fins:  $C_D^{parasite} = C_D^{parasite}|_{body} + \sum C_D^{parasite}|_{fins}$  (“ $\sum$ ” symbolizes a sum over each454 fin’s contribution). The body parasite drag ( $C_D^{parasite}|_{body}$ ) is expressed in a form developed by

455 Hoerner in his drag studies of bodies of revolution (Blevins, 1992) :

456

$$C_D^{parasite}|_{body} = \frac{K}{Re^\alpha} \left[ 1 + 1.5 \left( \frac{t}{SL} \right)^{3/2} + 7.0 \left( \frac{t}{SL} \right)^3 \right] \quad \text{eqn. 3}$$

458

459 The parasite drag due to all fins can be expressed similarly, albeit in a more complicated

460 form, and is further discussed in the Appendix and Electronic Supplement (ES 1, see eqns.

461 A.1.and A.2; and ES.6, ES.8 and ES.9). Here the effects of *pressure* drag are represented by462 the terms in  $t/SL$ , with  $t$  representing the body’s maximum diameter without the fins and  $SL$ 463 the pre-caudal length. The coefficient  $K/Re^\alpha$  represents the effects of the fluid’s shear stress464 on the body, with  $Re$  as the body’s Reynolds number,  $Re = SL \cdot u/v$ , and with  $v$  as the fluid’s465 kinematic viscosity ( $1.15 \times 10^{-6}$  and  $1.13 \times 10^{-6} \text{ m}^2/\text{s}$  for sea water and fresh water ( $16^\circ\text{C}$ )

466 respectively)). The fins’ parasite drag coefficient likewise includes a similar friction factor.

467 The coefficient  $K$  and exponent  $\alpha$  ( $>0$ ) parameterize the fluid’s friction as the combined result

468 of a shark’s denticulated skin and swimming motions on the body (Oeffner and Lauder, 2012;

469 Shelton et al., 2014). Recent studies of shark hydrodynamics make it clear that the

470 interactions of the boundary layer generated by the skin's denticles interacts with the flows  
 471 created by the tail's motions in ways that do not always minimize body drag, and moreover in  
 472 ways that are difficult to quantify in simple formulas such as in eqn. 3 (Shelton et al., 2014).  
 473 In the interest of simplicity, the values of  $K$  and  $\alpha$  correspond to those of a smooth flat plate  
 474 in longitudinal flow and supporting a turbulent boundary layer ( $K = 0.072$  and  $\alpha = 0.2$   
 475 (Blevins, 1992)). It should be stressed that using flat plate drag data should not be viewed as  
 476 approximating shark skin as smooth; but rather, as a proxy for translating the complex  
 477 interactions between denticulated skin and tail motions, as suggested by the averaging of the  
 478 few rigid body and active swimming drag data so far available on a single shark species  
 479 (Anderson et al., 2001).

480

481 The total drag exerted on the body is calculated by adding induced drag to the parasite drag  
 482 of eqn. 2. The former is derived from the fact that the induced drag coefficient is proportional  
 483 to the square of the lift force (Dole, 1981) and is given by

$$484 \quad F_D^{induced} = \frac{(1 + \delta)}{\pi AR} \cdot \frac{(F_{lift})^2}{\left(\frac{1}{2} \rho_{water} u^2\right) \cdot LS \cdot WD} \quad \text{eqn. 4}$$

485 Parameter  $AR$  is an overall body aspect ratio, here defined as that of the body's maximum  
 486 width, plus combined pectoral fin span, over pre-caudal body length  $SL$  (or  $AR = WD/SL$ ).

487 The force  $F_{lift}$  is the total lift generated by *all parts of the body*. Since it is assumed that the  
 488 shark is swimming horizontally and at constant speed, lift thus equals negative buoyancy ( $F_{lift}$   
 489  $= W$ ). Finally,  $\delta$  is an aerodynamic efficiency factor that is set to zero [14] (with aircraft,  $\delta$  is  
 490 typically less than 0.05).

491

492 Estimation of the metabolic expenditures connected to increased drag-production involves a  
 493 metric of speed. Postponing the study of expenditures generated at the optimal speed (Weihs,

494 1973), we first consider metabolic expenditures incurred at speeds  $u = u_{min}$  where total drag is  
 495 *minimal* (Alexander 1990). As discussed further in (Dole, 1981), a point of minimum drag  
 496 exists in cases where lift equals weight in aircraft (or body lift equals negative buoyancy in  
 497 sharks), as parasite and induced drag are proportional to  $u^2$  and  $1/u^2$  respectively.  
 498 Furthermore,  $u_{min}$  is also the point at which *induced drag is equal to parasite drag*. Thus  
 499 solving the latter constraint with equation eqn. 2 and 4 yields a way to calculate  $u_{min}$ :

500

$$501 \quad (u_{min})^4 = \frac{1}{\frac{1}{2} \rho_{water} \cdot WD \cdot LS \cdot C_D^{parasite}} \cdot \frac{2W^2}{\pi(WD)^2 \rho_{water}} \quad \text{eqn. 5}$$

502

503 Note that from eqns. 3, A.1 and A2 (and ES.7 and ES.8), it follows that  $C_D^{parasite}$  is also  
 504 proportional to  $(1/u_{min})^\alpha$ , with  $\alpha$  defined by eqn. 3, so that the final dependence on negative  
 505 buoyancy will be as  $u_{min} \sim W^{1/(4-\alpha)}$  (or  $\sim W^{1/3.8}$  using the flat plate proxy). This result, used  
 506 along with eqn. 2, thus suggest that increasing negative buoyancy will indeed lead to higher  
 507 swim speed and thus to higher drag.

508

509 The total metabolic power ( $P_{Total}$ ) required for a shark to move its body through the water at  
 510  $u_{min}$  will be given by:

$$511 \quad P_{total} = \frac{1.5F_D^{total}}{\eta} u_{min} = \frac{1.5F_{thrust} \cos \theta}{\eta} u_{min} \quad \text{eqn. 6a}$$

512

513 The second equation highlights the fact that the thrust has a vertical component due to the lift  
 514 produced by the heterocercal caudal fin. In cases where the latter  $\sim 0.55W$  (Fish and  
 515 Shannahan, 2000) the thrust's angle  $\theta$  with respect to the horizontal would be calculated from  
 516  $\tan \theta = 0.55W/F_D^{total}$ . The factor 1.5x arises from those effects of lateral tail-beat undulations

517 (which increase the required thrust) that remained unaccounted for by the proxy factor  
 518  $K/Re^{0.2}$  above (this proxy averages friction drag of rigid and swimming scup and dogfish in  
 519 Anderson et al. (Anderson et al., 2001)). (In comparison, a factor of 2.5 – 3 fold has been  
 520 used in fish as compared to a rigid model (Webb, 1971b)). Finally, the factor  $\eta$  measures both  
 521 metabolic and propulsive inefficiencies of the tail and body, and set here to  $\eta \sim 0.20$  (Webb,  
 522 1971a).

523

524 Being oriented perpendicularly to a shark's motion at all times means that the lift force used  
 525 to compensate for negative buoyancy does not perform any mechanical work on the body.  
 526 However, lift generation *does* involve metabolic energy production since lift production  
 527 *always* incurs additional drag in comparison to an identical body generating no lift. This can  
 528 be done by re-writing  $P_{total}$  as resulting from the power used to compensate for *total* drag, i.e.,  
 529 from the sum of parasite drag (eqn. 2) and induced drag (eqn. 4). As discussed further in the  
 530 Electronic Supplement (ES1), and evaluated for any arbitrary speeds  $u$ , one has:

531

$$532 \quad P_{total} = \frac{1}{\eta_{sw}} \left[ \left( \frac{1}{2} \rho_{water} \cdot SA \cdot C_D^{parasite} u^3 \right) + \frac{2W^2}{\pi(WD / SL) \rho_{water} (WD \cdot SL) \cdot u} \right] + W_m \quad \text{eqn. 6b}$$

533

534 Here  $\eta_{sw}$  is a speed-dependent function ( $\eta_{sw} = \beta u$ ) representing both metabolic and propulsive  
 535 efficiency of the tail's propulsive apparatus, and the constant  $W_m$  the Standard Metabolic Rate  
 536 corresponding to the internal metabolic processes that are independent of speed during active  
 537 swimming (Weihs 1973). The second term in eqn. 6b is what distinguishes a fish swimming  
 538 horizontally while neutrally buoyant ( $C_L = 0$ ), and an elasmobranch doing the same but at  $C_L$

539  $\neq 0$ . With the latter and at minimum speed, this second term shows an explicit dependence  
 540 on, and an increase with, negative buoyancy ( $\sim W^2$ ).

541

542 The increased metabolic cost of swimming at the optimal speed ( $u_{opt}$ ) while experiencing  
 543 increased negative buoyancy can be assessed by using eqn. 6b along with the approach  
 544 proposed by Weihs (1973). This is done by optimizing the distance travelled ( $l$ ) at fixed  
 545 stored energy ( $E = P_{total} l/u$ ), i.e., as a solution of the differential equation  $dl/du|_{opt} = 0$  under  
 546 the constraint of lift-compensated negative buoyancy. As shown in the Electronic  
 547 Supplement (ES1)  $P_{total}$  would increase with negative buoyancy ( $W$ ) as

548  $P_{total}^{opt} = 2W_m + 4GW^2 / \beta u_{opt}^2$  with  $G \equiv 2(1 + \delta) / (\pi AR \cdot \rho_{water} \cdot SL \cdot WD)$ . The optimal speed increases

549 with  $W$  as well, namely as  $u_{opt} \propto W^0$  &  $u_{opt} \propto W^{1/2}$  at small and large negative buoyancy

550 respectively, after solving the algebraic equation  $3GW^2/\beta = \left( \tau/\beta u_{opt}^4 - u_{opt}^2 W_m \right)$  where

551  $\tau \equiv \frac{1}{2} \rho_{water} SAC_D^{parasite}$ . Here the parameter  $GW^2/\beta$  determines the regime where the negative  
 552 buoyancy can be considered as “small” or “large”. Using typical shark morphological inputs,  
 553 this ratio is estimated at  $\sim 0.3 - 0.6 \text{ Watts } m^2 s^{-2}$ , which places sharks somewhere in between  
 554 the two limits. With both  $\beta$  and  $W_m$  being unknown in sharks, a quantitative assessment of the  
 555 increased costs associated with higher negative buoyancy is currently out of reach.

556

557

558 Equations 2-6a,b and ES 14 now allow us to calculate a power-velocity relationship, i.e.,  
 559 where velocity =  $u_{min}$  and =  $u_{opt}$  respectively for hypothetical sharks in water of different  
 560 densities. It has to be noted, that these equations are not analogous to the metabolic rate-  
 561 swimming speed relationships (where  $u$  is an independent variable), but rather are designed to  
 562 provide the lowest hypothetical costs of swimming at a given water density even though no

563 single shark can have an ideal pectoral fin (or body angling) to maximise lift-to-drag ratio  
 564 over the range of speeds simulated. Indeed, some species will feature morphological  
 565 adaptations for faster cruising whereas others for slower speeds. We have also reflected this  
 566 in our efficiency term  $\eta$ , which would be expected to vary with swimming speed of an  
 567 individual, but here we will assume that the muscle geometry and tail-beat kinematics are so  
 568 that  $\eta$  is maximised at  $u_{min}$ , mimicking a fish adapted to the cruising speed that minimises  
 569 required power. Muscular efficiency has been experimentally determined for rainbow trout  
 570 (*Onchorhynchus mykiss*) and showed that maximum efficiency achieved was 20% (Webb,  
 571 1971a).

572

573 Finally, to facilitate comparisons of the energetic impact of changing water density, we  
 574 computed the net cost of transport ( $COT_{net}$ ) to reflect the energetic cost of moving the animal  
 575 (and its variable mass depending on liver size) 1 m in distance.

576

$$577 \quad COT_{net} = \frac{P_{total}}{u_{min} m} \quad \text{eqn. 7}$$

578

579 With regards to the drag calculations, the necessary input morphometric data for the bull  
 580 shark and smooth dogfish discussed in the sections below are listed in Tables ES1 – ES4.

581

582 We decided to model 4 hypothetical scenarios (see Table 1 for all parameters used in the  
 583 models described previously) that sharks could use to counteract changing buoyancies:

584

585 *Scenario 1 – No compensation*

586 Elasmobranchs do not alter their morphology in response to changing environmental density  
587 and the mechanical costs of swimming change in accordance with the increasing negative  
588 buoyancy.

589

#### 590 *Scenario 2 – Reduced Liver Density*

591 Elasmobranchs have been shown to respond to experimentally increased negative buoyancy  
592 by decreasing the density of their livers (Malins and Barone, 1970), effectively increasing the  
593 buoyant force and reducing negative buoyancy. This scenario would result in no change in  
594 liver size (and no changes in surface area), but would dampen the increase in negative  
595 buoyancy with decreasing water density. We consider a liver density of  $920 \text{ kg m}^{-3}$  to be a  
596 lower bound of liver density. Livers of this density are encountered in neutrally buoyant  
597 sharks such as *Cetorhinus maximus* (Bone and Roberts, 1969).

598

#### 599 *Scenario 3 – Increasing Liver Size*

600 Increasing the size of the liver is another mechanism by which more upthrust can be  
601 generated and the impact of decreasing water density can be mitigated. We consider that 30%  
602 of the body volume to comprise of liver tissue to be the upper ceiling of hypothetical livers.  
603 This represents a realistic upper bound. Similar liver sizes are encountered in sharks that are  
604 close to neutral buoyancy and these species face a similar constraint in minimising negative  
605 buoyancy. Increasing liver volume while maintaining the volume of lean tissue is expected to  
606 increase surface area and decrease fineness ratio, affecting parasite drag.

607

#### 608 *Scenario 4 – Increasing Liver Size and reduction of Liver Density*

609 This scenario represents a combination of scenarios 2 and 4. The two distinct processes can  
610 act synergistically in providing more buoyancy. We modelled the energetic consequences of



611 these four scenarios, using the observed body composition of bull sharks (*Carcharhinus*  
612 *leucas*) captured in Florida by Baldrige (1970). Namely, we consider that the lean tissue  
613 density is  $1075 \text{ kg m}^{-3}$ , the nominal liver density is  $964 \text{ kg m}^{-3}$  and liver volume represents  
614 11% of whole body volume. We parameterised this model with a shark of 1m pre-caudal  
615 length and an associated mass of 15 kg (Thorburn, 2006).

616

## 617 **Field Methods**

### 618 *Capturing of animals*

619 Largetooth sawfish (*Pristis pristis*) and bull sharks were captured between September and  
620 October 2011 and 2012 in the Fitzroy River, Western Australia. Animals were captured using  
621 bottom-set gill-nets (15 and 20 cm stretched mesh-size) set at night. Nets were checked at  
622 regular intervals of 1.5 hours.

623

### 624 **Measurement and calculation of body density**

625 Captured sawfish and bull sharks were initially sexed and measured. Animals were weighed  
626 to the nearest 5 g using a sling and digital hanging-scale (UWE HS 7500 series, Capacity:  
627 7500g, Resolution: 5g). To determine the submerged weight ( $W_{\text{sub}}$ ) of the animals, a sling  
628 was suspended from a tripod (Daiwa infinity weigh tripod) in water of approximately 1.2 m  
629 depth. Before animals were placed into the sling, the weight of the sling was zeroed. Animals  
630 remained motionless in the sling and a weight was read after the scale stabilised. While  
631 weighing, it was ensured that no part of the sling touched the river-bed or the tripod. After  
632 submerged weight was determined, we measured the mass of animals using the same sling  
633 and scale, without submergence. Care was taken that no water remained in the sling when the  
634 mass was determined. Following these measurements, whole body density ( $\rho_{\text{Shark}}$ ) was  
635 calculated based on the density of freshwater at  $28 \text{ }^{\circ}\text{C}$ , the common water temperature during

636 night time (Gleiss & Morgan, unpubl. data) with a corresponding water density of  $996 \text{ kg m}^{-3}$ ,  
637 as determined by the relation  $\rho_{\text{shark}} = (W_{\text{air}} \rho_{\text{water}}) / (W_{\text{air}} - W_{\text{sub}})$ .

638

### 639 **Determination of Liver density and liver-free body density**

640 All individuals that perished in gill-nets were used for further analysis of buoyancy  
641 regulation. After determining whole body density, fish were dissected and liver density and  
642 volume was determined by displacing livers in a graded water cylinder. Livers were  
643 forcefully submerged with a long toothpick, to overcome positive buoyancy. The volume of  
644 the toothpick was negligible in relation to liver volume. Liver density ( $\rho_{\text{liver}}$ ) was simply  
645 calculated from mass and displaced volume. Density of the liver-free body ( $\rho_{\text{lean}}$ ) was  
646 determined in the same fashion as prior to dissection of the liver, by determination of mass  
647 and submerged weight using the described sling.

648

### 649 **Meta-analysis of densities in marine and freshwater elasmobranchs**

650 In order to compare buoyancy between marine and freshwater forms, we collated all such  
651 measurements from the literature, primarily based on two publications (Baldrige Jr, 1970;  
652 Bone and Roberts, 1969). Some parameters were not reported in these original papers (e.g.  
653 liver-free density), but could be calculated based on the data provided. We excluded any  
654 deep-sea individuals from the analysis due to significantly different densities (near neutral) as  
655 a result of the different lifestyle, as well as the basking shark for the same reason, resulting in  
656 113 Individuals of 27 marine species being included in the analysis. In order to compare our  
657 data from freshwater elasmobranchs to the marine forms, we analysed the data using Mixed  
658 Models, due to unbalanced sample size for the different species (Zuur et al., 2007). To  
659 account for these repeated measures on a single species, we used the species ID as a random  
660 effect in our model. Models also included lifestyle as a covariate, which was determined

661 based on the species description in Compagno (2001), separating species into two groups  
 662 considered to exclusively associate with the sea-bed (demersal), and those that swim in the  
 663 water-column (pelagic & benthopelagic, see Supplementary Table ES1), as previous papers  
 664 have shown the impact of lifestyle on buoyancy in elasmobranchs (Bone and Roberts, 1969).  
 665 Mixed Models were fitted using the "lme4" package implemented in the R statistical package  
 666 (R Development Core Team, 2010) and model selection was based on small sample corrected  
 667 Akaike's Information Criterion (AIC<sub>c</sub>) computed in the model selection package "MuMin".  
 668

## 669 **Appendix. The parasite drag of fins**

670  
 671 An aircraft wing's drag is calculated with computer programs that, from an airfoil's known  
 672 shape and dimension data, yield the parasite and induced drag, the lift force and aerodynamic  
 673 moments. Having no information about the airfoil profiles of shark fins, we resort to an  
 674 approach similar to that of eqn. 3. Here again the parasite drag of airfoils and fins generate  
 675 both friction and pressure drag, with the latter being generally much smaller than the former.  
 676 The effects of both on each fin is represented by another equation developed by Hoerner, but  
 677 applied to symmetrical airfoils ((Blevins, 1992); p. 352):

$$678 \quad C_{D \text{ parasite}} \Big|_{fin} = C_{friction}^{fin} \left[ 1 + 2.0 \left( \left\langle \frac{t_{fin}}{FC} \right\rangle \right) + 60.0 \left( \left\langle \frac{t_{fin}}{FC} \right\rangle \right)^4 \right] \quad \text{eqn. A.1}$$

679 The pressure drag terms in  $\langle t_{fin}/FC \rangle$  represent the mean *fin maximum thickness over fin*  
 680 *chord*, as averaged over chord span. Herein  $\langle t_{fin}/FC \rangle = 0.2$  for all caudal and non-caudal  
 681 fins. The factor  $C_{friction}^{fin}$  is, on the other hand, the shear stress friction created on each side of  
 682 a fin. The detailed derivation of this coefficient appears in the Electronic Supplement (ES 1).  
 683 Unlike the body which was likened to a thin, flat rectangular surface of same area for the  
 684 purpose of friction coefficient calculation (i.e., the  $K/Re^a$  factor in eqn.3), a non-caudal fin is  
 685 regarded instead as a thin and two-sided right triangle of base (or "root chord") FC and height

686 (or “span”) FS. The distinction is necessary since the shear stress exerted on a rectangle in the  
 687 direction of the flow is the same over its width, in contrast to that of a triangle in which both  
 688 chord and shear stress decreases span-wise from (fin) root to tip. Covering each side of a fin  
 689 with long (chordwise) and narrow (spanwise) rectangular strips of known shear stress (Fig.  
 690 ES.1), the friction factor comes out as follows for *each non-caudal fin*

$$691 \quad C_{friction}^{non-caudal-fin} = \left( \frac{(FS)^{2-\alpha}}{SA} \right) \cdot 2 \cdot \frac{K}{(u/\nu)^\alpha} \left( \frac{FC}{FS} \right)^{1-\alpha} \left( \frac{1}{2-\alpha} \right) \quad \text{eqn. A.2}$$

692 As with the body, the friction drag coefficient of each strip is parameterized by our proxy  
 693  $C_{friction} = K/Re^\alpha$ . On the other hand, and being highly swept, caudal fins are instead  
 694 approximated by two right triangles of differing root chords (FCA and FCB) but of same  
 695 span (FS), with one triangle inserted into the other in a manner to superpose their span  
 696 (Figure ES.2). Here FCA is the root chord of the actual swept fin and  $FCA < FCB$  by  
 697 construction. Using strips again to calculate the friction coefficient yields the same equation  
 698 as A.2, but with the factor  $(FC/FS)^{1-\alpha}$  replaced by  $(FCA/FS)^{1-\alpha}$ .

699

700 The parasite drag force of a fin (caudal and non-caudal) is then calculated by multiplying the  
 701 friction drag coefficient above by the factor  $1/2 \rho_{water} u^2 SA$ , per eqn. 2 ( $u$  being the shark’s  
 702 speed). Note that eqn. A.2 assumes strictly chord-wise flows, thus neglecting cross-flow  
 703 effects. Note also that with shark bodies and fins being slender, the *parasite* drag formulae  
 704 discussed in this paper are generally insensitive to angles of attack (AOA), i.e., *when away*  
 705 *from stall*. *Induced* drag, on the other hand, *is* sensitive to AOA and specific airfoil profile,  
 706 but the constraint  $W = F_{lift}$  used here allows us to ignore such details as  $W$  is known.

707

708

709

710

711 **Acknowledgments**

712 We would like to thank Yuuki Watanabe and two anonymous referees for their critical  
 713 comments; they greatly increased the quality of our paper. This project was generously  
 714 supported by grants from the Australia Pacific Science Foundation, National Geographic's  
 715 Waitt Foundation Program, the Fisheries Society of the British Isles and the Western  
 716 Australian Government's NRM program. ACG was supported by Endeavour Research  
 717 Fellowship. Invaluable field support was provided by the Nyikina-Mangala Rangers. JP  
 718 thanks G. Bramesfeld for fruitful discussions with regards to estimating the shear stress  
 719 sustained by triangular flat surfaces

720

721 **References**

- 722 **Alexander, R. M.** (1966). Physical aspects of swimbladder function. *Biological*  
 723 *Reviews* **41**, 141-176.
- 724 **Alexander, R. M. N.** (1990). Size, speed and buoyancy adaptations in aquatic  
 725 animals. *American Zoologist* **30**, 189-196.
- 726 **Alexander, R. M. N.** (2003). Principles of Animal Locomotion. Princeton: Princeton  
 727 University Press.
- 728 **Anderson, E. J., McGillis, W. R. and Grosenbaugh, M. A.** (2001). The boundary  
 729 layer of swimming fish. *Journal of Experimental Biology* **204**, 81-102.
- 730 **Baldrige Jr, H. D.** (1970). Sinking factors and average densities of Florida sharks as  
 731 functions of liver buoyancy. *Copeia*, 744-754.
- 732 **Ballantyne, J. and Robinson, J.** (2010). Freshwater elasmobranchs: a review of their  
 733 physiology and biochemistry. *Journal of Comparative Physiology B: Biochemical, Systemic,*  
 734 *and Environmental Physiology* **180**, 475-493.
- 735 **Ballantyne, J. S. and Fraser, D. I.** (2013). Euryhaline elasmobranchs. In *Fish*  
 736 *Physiology: Euryhaline Fishes: Fish Physiology*, vol. 32 eds. S. D. McCormick A. P. Farrell  
 737 and C. J. Brauner), pp. 125-198: Academic Press.
- 738 **Blevins, R. D.** (1992). Applied fluid dynamics handbook Malabar, FL: Krieger  
 739 Publishing Company.
- 740 **Boisclair, D. and Leggett, W. C.** (1989). The importance of activity in bioenergetics  
 741 models applied to actively foraging fishes. *Canadian Journal of Fisheries and Aquatic*  
 742 *Sciences* **46**, 1859-1867.
- 743 **Bone, Q.** (1978). Locomotor muscle. In *Fish physiology*, vol. 7 eds. W. S. Hoar and  
 744 D. J. Randall), pp. 361-424. New York: Academic Press.
- 745 **Bone, Q. and Roberts, B. L.** (1969). The density of elasmobranchs. *J. Mar. Biol.*  
 746 *Assoc. UK* **49**, 913-937.
- 747 **Carlson, J. K. and Parsons, G. R.** (1999). Seasonal differences in routine oxygen  
 748 consumption rates of the bonnethead shark. *Journal of Fish Biology* **55**, 876-879.
- 749 **Castro-Santos, T.** (2006). Modeling the effect of varying swim speeds on fish  
 750 passage through velocity barriers. *Transactions of the American Fisheries Society* **135**, 1230-  
 751 1237.

- 752           **Compagno, L. J. V.** (2001). Sharks of the world: an annotated and illustrated  
753 catalogue of shark species known to date: FAO.
- 754           **Corner, E., Denton, E. and Forster, G.** (1969). On the buoyancy of some deep-sea  
755 sharks. *Proceedings of the Royal Society B: Biological Sciences* **171**, 415-429.
- 756           **Davenport, J.** (1999). Swimbladder volume and body density in an armoured benthic  
757 fish, the streaked gurnard. *Journal of Fish Biology* **55**, 527-534.
- 758           **Dole, C. E.** (1981). Flight Theory and Aerodynamics. New York: John Wiley & Sons.
- 759           **Fish, F. E. and Shannahan, L. D.** (2000). The role of the pectoral fins in body trim  
760 of sharks. *Journal of Fish Biology* **56**, 1062-1073.
- 761           **Ghalambor, C. K., Walker, J. A. and Reznick, D. N.** (2003). Multi-trait selection,  
762 adaptation, and constraints on the evolution of burst swimming performance. *Integrative and*  
763 *Comparative Biology* **43**, 431-438.
- 764           **Gleiss, A. C., Jorgensen, S. J., Liebsch, N., Sala, J. E., Norman, B., Hays, G. C.,**  
765 **Quintana, F., Grundy, E., Campagna, C. and Trites, A. W.** (2011a). Convergent evolution  
766 in locomotory patterns of flying and swimming animals. *Nature Communications* **2**, 352.
- 767           **Gleiss, A. C., Norman, B. and Wilson, R. P.** (2011b). Moved by that sinking  
768 feeling: variable diving geometry underlies movement strategies in whale sharks. *Functional*  
769 *Ecology* **25**, 595-607.
- 770           **Greek-Walker, M. and Pull, G.** (1975). A survey of red and white muscle in marine  
771 fish. *Journal of Fish Biology* **7**, 295-300.
- 772           **Hainsworth, F. R.** (1988). Induced drag savings from ground effect and formation  
773 flight in brown pelicans. *Journal of Experimental Biology* **135**, 431-444.
- 774           **Hussey, N. E., Brush, J., McCarthy, I. D. and Fisk, A. T.** (2010). [ $\delta$ ]<sup>15</sup>N and  
775 [ $\delta$ ]<sup>13</sup>C diet-tissue discrimination factors for large sharks under semi-controlled  
776 conditions. *Comparative Biochemistry and Physiology - Part A: Molecular & Integrative*  
777 *Physiology* **155**, 445-453.
- 778           **Lee, C. E. and Bell, M. A.** (1999). Causes and consequences of recent freshwater  
779 invasions by saltwater animals. *Trends in Ecology & Evolution* **14**, 284-288.
- 780           **Long, J. A.** (1995). The rise of fishes: 500 million years of evolution: Johns Hopkins  
781 University Press Baltimore.
- 782           **Lowe, C. G.** (2001). Metabolic rates of juvenile scalloped hammerhead sharks  
783 (*Sphyrna lewini*). *Marine Biology* **139**, 447-453.
- 784           **Malins, D. C. and Barone, A.** (1970). Glycerol ether metabolism: regulation of  
785 buoyancy in dogfish *Squalus acanthias*. *Science* **167**, 79-80.
- 786           **Martin, R. A.** (2005). Conservation of freshwater and euryhaline elasmobranchs: a  
787 review. *Journal of the Marine Biological Association of the United Kingdom* **85**, 1049-1073.
- 788           **Meloni, C. J., Cech Jr, J. J., Katzman, S. M. and Gatten Jr, R.** (2002). Effect of  
789 brackish salinities on oxygen consumption of bat rays (*Myliobatis californica*). *Copeia* **2002**,  
790 462-465.
- 791           **Oeffner, J. and Lauder, G. V.** (2012). The hydrodynamic function of shark skin and  
792 two biomimetic applications. *The Journal of experimental biology* **215**, 785-795.
- 793           **Pelster, B.** (2009). Buoyancy Control in Aquatic Vertebrates. *Cardio-Respiratory*  
794 *Control in Vertebrates*, 65-98.
- 795           **Pillans, R. D. and Franklin, C. E.** (2004). Plasma osmolyte concentrations and rectal  
796 gland mass of bull sharks *Carcharhinus leucas*, captured along a salinity gradient.  
797 *Comparative Biochemistry and Physiology Part A: Molecular & Integrative Physiology* **138**,  
798 363-371.
- 799           **Pope, A.** (1951). Basic Wing and Airfoil Theory. New York: reprinted by Dover  
800 Publications.

- 801 **Priede, I. G., Froese, R., Bailey, D. M., Bergstad, O. A., Collins, M. A., Dyb, J. E.,**  
 802 **Henriques, C., Jones, E. G. and King, N.** (2006). The absence of sharks from abyssal  
 803 regions of the world's oceans. *Proceedings of the Royal Society B: Biological Sciences* **273**,  
 804 1435-1441.
- 805 **R Development Core Team.** (2010). R: A language and environment for statistical  
 806 computing. Vienna, Austria: R Foundation for Statistical Computing.
- 807 **Shelton, R. M., Thornycroft, P. J. M. and Lauder, G. V.** (2014). Undulatory  
 808 locomotion of flexible foils as biomimetic models for understanding fish propulsion. *The*  
 809 *Journal of experimental biology* **217**, 2110-2120.
- 810 **Thorburn, D. C.** (2006). Biology, ecology and trophic interactions of elasmobranchs  
 811 and other fishes in riverine waters of Northern Australia., vol. Ph.D., pp. 135. Murdoch:  
 812 Murdoch University.
- 813 **Thorson, T. B.** (1962). Partitioning of body fluids in the Lake Nicaragua shark and  
 814 three marine sharks. *Science* **138**, 688-690.
- 815 **Vermeij, G. J. and Dudley, R.** (2000). Why are there so few evolutionary transitions  
 816 between aquatic and terrestrial ecosystems? *Biological Journal of the Linnean Society* **70**,  
 817 541-553.
- 818 **Videler, J. and Nolet, B.** (1990). Costs of swimming measured at optimum speed:  
 819 scale effects, differences between swimming styles, taxonomic groups and submerged and  
 820 surface swimming. *Comparative Biochemistry and Physiology Part A: Physiology* **97**, 91-99.
- 821 **Walker, J., Ghalambor, C., Griset, O., McKenney, D. and Reznick, D.** (2005). Do  
 822 faster starts increase the probability of evading predators? *Functional Ecology* **19**, 808-815.
- 823 **Ware, D. M.** (1978). Bioenergetics of pelagic fish - theoretical changes in swimming  
 824 speed and ration with body size. *Journal of the Fisheries Research Board of Canada* **35**, 220-  
 825 228.
- 826 **Watanabe, Y. Y., Lydersen, C., Fisk, A. T. and Kovacs, K. M.** (2012). The slowest  
 827 fish: Swim speed and tail-beat frequency of Greenland sharks. *Journal of Experimental*  
 828 *Marine Biology and Ecology* **426**, 5-11.
- 829 **Webb, P.** (1971a). The swimming energetics of trout II. Oxygen consumption and  
 830 swimming efficiency. *Journal of Experimental Biology* **55**, 521-540.
- 831 **Webb, P. W.** (1971b). The swimming energetics of trout I. Thrust and power output  
 832 at cruising speeds. *Journal of Experimental Biology* **55**, 489-520.
- 833 **Webb, P. W.** (1988). Simple Physical Principles and Vertebrate Aquatic Locomotion.  
 834 *American Zoologist* **28**, 709-725.
- 835 **Weih, D.** (1973). Optimal fish cruising speed. *Nature* **245**, 48 - 50.
- 836 **Weitkamp, L. A.** (2008). Buoyancy regulation by hatchery and wild coho salmon  
 837 during the transition from freshwater to marine environments. *Transactions of the American*  
 838 *Fisheries Society* **137**, 860-868.
- 839 **Wetherbee, B. M. and Nichols, P. D.** (2000). Lipid composition of the liver oil of  
 840 deep-sea sharks from the Chatham Rise, New Zealand. *Comparative Biochemistry and*  
 841 *Physiology Part B: Biochemistry and Molecular Biology* **125**, 511-521.
- 842 **Wilga, C. and Lauder, G.** (2002). Function of the heterocercal tail in sharks:  
 843 quantitative wake dynamics during steady horizontal swimming and vertical maneuvering.  
 844 *Journal of Experimental Biology* **205**, 2365-2374.
- 845 **Zuur, A. F., Ieno, E. N. and Smith, G. M.** (2007). Analysing ecological data:  
 846 Springer New York.

847

848

849

850 **Table 1 Hypothetical morphological scenarios that were modelled in response to**  
 851 **changing salinity.** Scenario 0 represents the Null Model of the morphological characters for  
 852 a 1.25 m bull shark in marine waters.  
 853

|                                            | <b>Scenario 0</b> | <b>Scenario 1</b> | <b>Scenario 2</b>     | <b>Scenario 3</b>        | <b>Scenario 4</b>                                |
|--------------------------------------------|-------------------|-------------------|-----------------------|--------------------------|--------------------------------------------------|
|                                            | Marine            | No compensation   | Increasing Liver Size | Decreasing Liver Density | Increasing Liver Size + Decreasing Liver Density |
| Mass (kg)                                  | 14.5              | 14.5              | 18.3                  | 14.5                     | 18.3                                             |
| Water Density (kg m <sup>-3</sup> )        | 1026              | 996               | 996                   | 996                      | 996                                              |
| Lean Tissue Density (kg m <sup>-3</sup> )  | 1076              | 1076              | 1076                  | 1076                     | 1076                                             |
| Liver Tissue Density (kg m <sup>-3</sup> ) | 964               | 964               | 964                   | 920                      | 920                                              |
| Lean Tissue Volume (m <sup>3</sup> )       | 0.0118            | 0.0118            | 0.0118                | 0.0118                   | 0.0118                                           |
| Liver Tissue Volume (m <sup>3</sup> )      | 0.0020            | 0.0020            | 0.0045                | 0.0021                   | 0.0045                                           |
| Surface Area of body (m <sup>2</sup> )     | 0.59              | 0.59              | 0.66                  | 0.59                     | 0.66                                             |
| Fineness ( $\frac{t}{SL}$ )                | 0.212             | 0.212             | 0.234                 | 0.211                    | 0.234                                            |
| Projected Frontal Area (m <sup>2</sup> )   | 0.035             | 0.035             | 0.045                 | 0.035                    | 0.045                                            |
| Submerged Weight (N)                       | 4.40              | 8.44              | 7.26                  | 7.47                     | 4.44                                             |

854

855

856

857

858

859

860

861

862

863

864

865

866

867

868

869

870

871

872

873

874

875

876

877

878

879

880

881

882



883 **Table 2 Details of all sawfish and bull sharks that were weighed in air and while**  
 884 **submerged.**  
 885  
 886

|                   | <b>TL<br/>(mm)</b> | <b>Mass<br/>(g)</b> | <b>W<sub>sub</sub> (N)</b> | <b>Buoyancy<br/>Ratio (%)</b> | <b>V<br/>(ml)</b> | <b>P<sub>Shark</sub> (kg m<sup>-3</sup>)</b> |
|-------------------|--------------------|---------------------|----------------------------|-------------------------------|-------------------|----------------------------------------------|
| <i>C. leucas</i>  | 862                | 4175                | 2.50                       | 6.11                          | 3936              | 1060.8                                       |
| <i>C. leucas</i>  | 824                | 3390                | 2.35                       | 7.08                          | 3163              | 1071.9                                       |
| <i>C. leucas</i>  | 851                | 4145                | 2.60                       | 6.39                          | 3896              | 1064.0                                       |
| <i>C. leucas</i>  | 950                | 4815                | 2.89                       | 6.13                          | 4538              | 1061.0                                       |
| <i>C. leucas</i>  | 840                | 3765                | 2.40                       | 6.51                          | 3534              | 1065.3                                       |
| <i>P. pristis</i> | 1224               | 4600                | 2.74                       | 6.07                          | 4338              | 1060.3                                       |
| <i>P. pristis</i> | 1018               | 2365                | 1.47                       | 6.34                          | 2224              | 1063.4                                       |
| <i>P. pristis</i> | 1140               | 3780                | 2.48                       | 6.69                          | 3541              | 1067.4                                       |
| <i>P. pristis</i> | 1151               | 3660                | 2.26                       | 6.28                          | 3444              | 1062.8                                       |
| <i>P. pristis</i> | 1090               | 3130                | 1.91                       | 6.23                          | 2947              | 1062.2                                       |
| <i>P. pristis</i> | 1082               | 2890                | 1.81                       | 6.40                          | 2716              | 1064.1                                       |
| <i>P. pristis</i> | 1025               | 3015                | 1.81                       | 6.14                          | 2841              | 1061.1                                       |
| <i>P. pristis</i> | 1119               | 3060                | 2.01                       | 6.70                          | 2866              | 1067.5                                       |
| <i>P. pristis</i> | 1021               | 2170                | 1.32                       | 6.22                          | 2043              | 1062.1                                       |
| <i>P. pristis</i> | 1207               | 4230                | 2.75                       | 6.62                          | 3966              | 1066.6                                       |
| <i>P. pristis</i> | 1079               | 2765                | 1.77                       | 6.51                          | 2595              | 1065.4                                       |
| <i>P. pristis</i> | 1040               | 2760                | 1.96                       | 7.25                          | 2570              | 1073.8                                       |
| <i>P. pristis</i> | 1104               | 2895                | 1.91                       | 6.74                          | 2711              | 1067.9                                       |
| <i>P. pristis</i> | 1025               | 2215                | 1.47                       | 6.77                          | 2073              | 1068.3                                       |
| <i>P. pristis</i> | 912                | 1530                | 1.03                       | 6.86                          | 1431              | 1069.4                                       |
| <i>P. pristis</i> | 1172               | 4000                | 2.50                       | 6.38                          | 3760              | 1063.8                                       |
| <i>P. pristis</i> | 1120               | 3600                | 2.11                       | 5.97                          | 3399              | 1059.3                                       |

Table 3 Details of the sawfish (n=2) and bull sharks (n=3) that were available for full necropsies.

|                                                          | <i>Carcharhinus leucas</i> |          |          |             | <i>Pristis pristis</i> |          |             |
|----------------------------------------------------------|----------------------------|----------|----------|-------------|------------------------|----------|-------------|
|                                                          | <i>1</i>                   | <i>2</i> | <i>3</i> | Mean        | <i>1</i>               | <i>2</i> | Mean        |
| <b>Total length (mm)</b>                                 | 862                        | 824      | 851      | 846 ± 20    | 1146                   | 1130     | 1138 ± 11   |
| <b>Mass (g)</b>                                          | 4175                       | 3390     | 4145     | 3903 ± 445  | 4000                   | 3600     | 3800 ± 283  |
| <b>W<sub>sub</sub> (N)</b>                               | 2.50                       | 2.35     | 2.60     | 253 ± 13    | 2.50                   | 2.07     | 235 ± 28    |
| <b>Body Volume (ml)</b>                                  | 4429                       | 3634     | 4410     | 4158 ± 454  | 4255                   | 3813     | 4034 ± 312  |
| <b>% Mass / Submerged Weight</b>                         | 6.11                       | 7.08     | 6.39     | 6.53 ± 0.50 | 6.38                   | 5.97     | 6.17 ± 0.28 |
| <b>Mass excluding liver (g)</b>                          | 3860                       | 3150     | 3750     | 3587 ± 382  | 3770                   | 3360     | 3565 ± 290  |
| <b>Submerged Weight excluding liver (g)</b>              | 280                        | 225      | 260      | 255 ± 28    | 255                    | 215      | 235 ± 28    |
| <b>Liver Mass (g)</b>                                    | 410                        | 226      | 289      | 308 ± 93    | 230                    | 240      | 235 ± 7     |
| <b>Liver Volume (ml)</b>                                 | 450                        | 235      | 320      | 335 ± 108   | 234                    | 245      | 240 ± 8     |
| <b>Body Volume excluding Liver (ml)</b>                  | 3594                       | 2937     | 3504     | 3345 ± 356  | 4021                   | 3579     | 3800 ± 312  |
| <b>Body Density ( kg m<sup>-3</sup>)</b>                 | 1061                       | 1072     | 1064     | 1066 ± 6    | 1064                   | 1059     | 1060 ± 3    |
| <b>Body Density excluding liver ( kg m<sup>-3</sup>)</b> | 1074                       | 1073     | 1070     | 1072 ± 2    | 1068                   | 1064     | 1066 ± 3    |
| <b>% Liver Volume</b>                                    | 7.71                       | 6.22     | 8.88     | 7.60 ± 1.33 | 5.51                   | 6.15     | 5.83 ± 0.45 |
| <b>% Liver Mass</b>                                      | 9.81                       | 6.65     | 6.98     | 7.82 ± 1.74 | 5.75                   | 6.67     | 6.21 ± 0.65 |
| <b>Liver Density ( kg m<sup>-3</sup>)</b>                | 910                        | 960      | 904      | 920 ± 31    | 982                    | 980      | 981 ± 2     |

**Table 4 Model selection criteria for 3 analysis (Fig. 2) comparing morphological data from freshwater elasmobranchs sampled as part of this study and marine forms published in previous papers (Baldrige Jr, 1970; Bone and Roberts, 1969).**

|                                    | <b>Model</b>                                                  | <b>df</b> | <b>logLik</b> | <b>AICc</b> | <b>delta</b> | <b>weight</b> |
|------------------------------------|---------------------------------------------------------------|-----------|---------------|-------------|--------------|---------------|
| <b>Mass vs<br/>Liver<br/>Mass</b>  | logLiverMass ~ logMass                                        | 4         | 45.88         | -83.4       | 0            | 0.433         |
|                                    | logLiverMass ~ logMass + Lifestyle                            | 6         | 47.21         | -82.3       | 1.14         | 0.245         |
|                                    | logLiverMass ~ logMass + Lifestyle + Habitat                  | 5         | 46.179        | -81.8       | 1.6          | 0.194         |
|                                    | logLiverMass ~ logMass + Habitat                              | 7         | 48.002        | -81         | 2.44         | 0.128         |
| <b>Mass vs<br/>Wsub</b>            | logWsub ~ logMass + Habitat                                   | 5         | 122.817       | -233.9      | 0            | 0.5           |
|                                    | logWsub ~ logMass + Lifestyle + Habitat + logMass * Lifestyle | 6         | 122.92        | -231.7      | 2.18         | 0.168         |
|                                    | logWsub ~ logMass + Lifestyle                                 | 4         | 123.057       | 231.2       | 2.67         | 0.131         |
|                                    | logWsub ~ logMass + Habitat*Lifestyle                         | 7         | 119.679       | 231.1       | 2.86         | 0.12          |
| <b>Liver<br/>Density</b>           | P <sub>Liver</sub> ~ Lifestyle + Habitat                      | 6         | 254.169       | -495.6      | 0            | 0.865         |
|                                    | P <sub>Liver</sub> ~ Lifestyle                                | 5         | 251.078       | -491.6      | 3.96         | 0.120         |
|                                    | P <sub>Liver</sub> ~ Habitat                                  | 4         | 247.401       | -486.4      | 9.13         | 0.009         |
|                                    | P <sub>Liver</sub> ~ 1                                        | 1         | 245.926       | -485.6      | 9.94         | 0.006         |
| <b>Lean<br/>Tissue<br/>Density</b> | P <sub>Lean Tissue Density</sub> ~ 1                          | 1         | 77.389        | -148.6      | 0            | 0.605         |
|                                    | P <sub>Lean Tissue Density</sub> ~ Habitat                    | 4         | 77.415        | -146.5      | 2.08         | 0.214         |
|                                    | P <sub>Lean Tissue Density</sub> ~ Lifestyle                  | 5         | 78.033        | 145.6       | 3.01         | 0.135         |
|                                    | P <sub>Lean Tissue Density</sub> ~ Lifestyle + Habitat        | 6         | 78.059        | -143.4      | 5.16         | 0.046         |

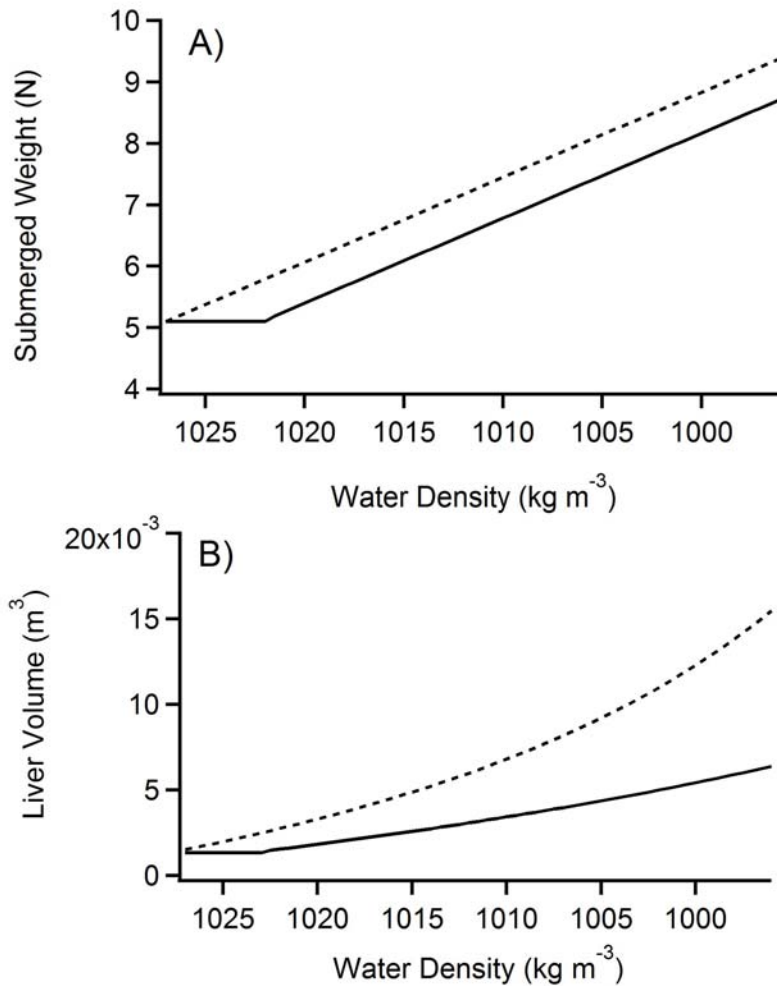

**Figure 1 Modelled implications of water density for the buoyancy control of elasmobranchs.** Data were modelled based on the equation 1 and parameterised with a hypothetical shark of 15 kg with the same body composition and tissue densities as those observed in Baldrige (Baldrige Jr, 1970). The stippled line indicates the response to changing environmental density if no compensation in liver density occurs. The solid lines represents the same model, assuming that the animal has the ability to reduce its liver density to those encountered in neutrally buoyant deep-sea sharks ( $\sim 920 \text{ kg m}^{-3}$ ) representing the lowest liver densities encountered in elasmobranchs. A) Assuming no morphological changes (i.e. constant tissue volumes and densities), submerged weight would increase by  $\sim 120\%$  for a shark moving into freshwater. A reduction in liver density to  $920 \text{ kg m}^{-3}$  would be able to compensate any changes in water density up to  $\sim 1025 \text{ kg m}^{-3}$ , yet still resulting in submerged weight doubling. B) Negative buoyancy may also be compensated by changes in liver size; in order to maintain the same submerged weight (4.5 N) as in marine waters, our hypothetical shark's liver would have to increase 8-fold in volume (stippled line) and even if liver density would be reduced, liver volume would have to increase 3-4 fold to maintain similar buoyancy as in marine waters. These cases would result in liver size comprising 70% or 35% of whole body volume respectively compared to 11% in marine waters. In all scenarios described, lean tissue density and volume are unchanged.

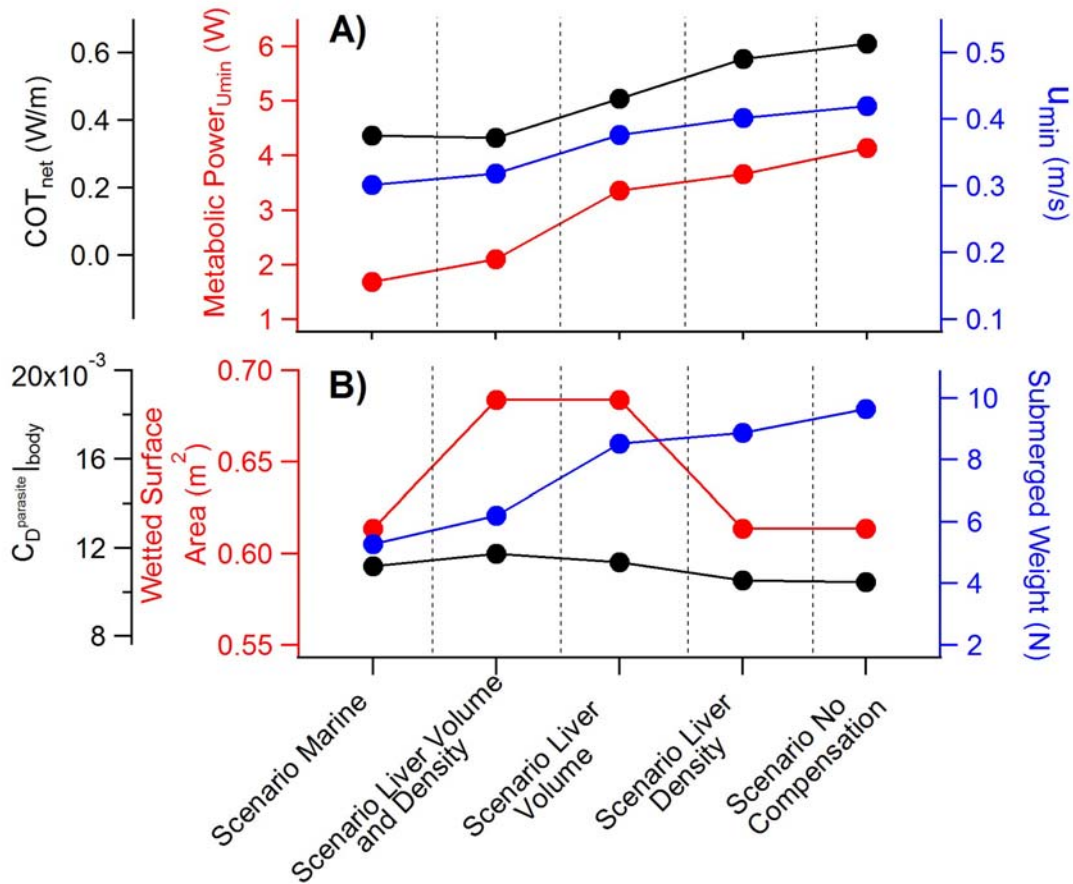

**Figure 2 Parameters and results of our modelling exercise (bull shark, 1.2m standard length).** A) All scenarios result in increasing costs of locomotion, as a result of increasing  $u_{min}$  which increases drag. All hypothetical scenarios also result in increasing cost of transport, with the exception of the scenario where liver size increases and liver density decreases. B) This pattern is a result of all scenarios being characteristic of increased negative buoyancy, with the lowest increase where both density and size have been altered. Based on our considerations of  $u_{min}$ , all potential compensatory strategies result in increased costs. Based on  $u_{min}$ , increases in liver size and liver density should be the optimal strategy for compensation. This however, ignores the cost of swimming at faster speeds, which are discussed in Figure 4.

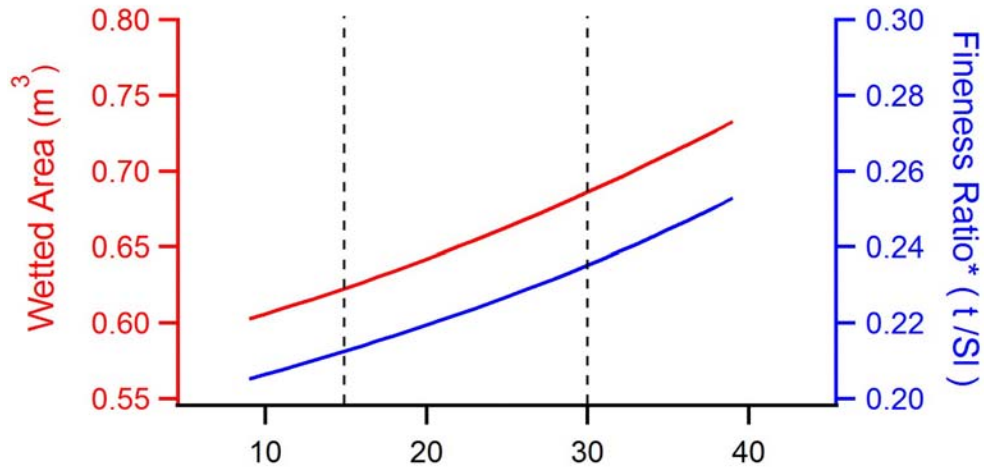

**Figure 3 Hydrodynamics of increasing liver size.** To gauge the costs associated with faster speeds that may be employed during foraging, here we model the implications of increasing liver sizes on drag. As induced drag responds  $1/u^2$ , its contribution to total drag at greater speeds will diminish, while parasitedrag will increase  $u^2$ . Here we show that increasing liver size results in an increase of two of the primary parameters that contribute to parasite drag. All things being equal, drag is proportional to wetted area (eqn. 3) and our approximation suggests that this parameter will increase by  $>10\%$  from liver volume of 15% - 30% (dashed vertical lines). The Fineness Ratio is the dominant factor in the calculation of  $C_D^{parasite}|_{body}$  (eqn. 3). Increasing the fineness ratio by 10% subsequently results in a less streamlined body and a higher drag coefficient proportional to that increase. These data therefore suggest that compensatory mechanisms involving increasing liver size may reduce the costs at low swimming speeds, but will result in significantly increased costs at faster speeds. \*Please note that our definition of fineness ratio is the inverse of its typical use. We have chosen to adhere to this format as a result of the formulation in eqn. 3.

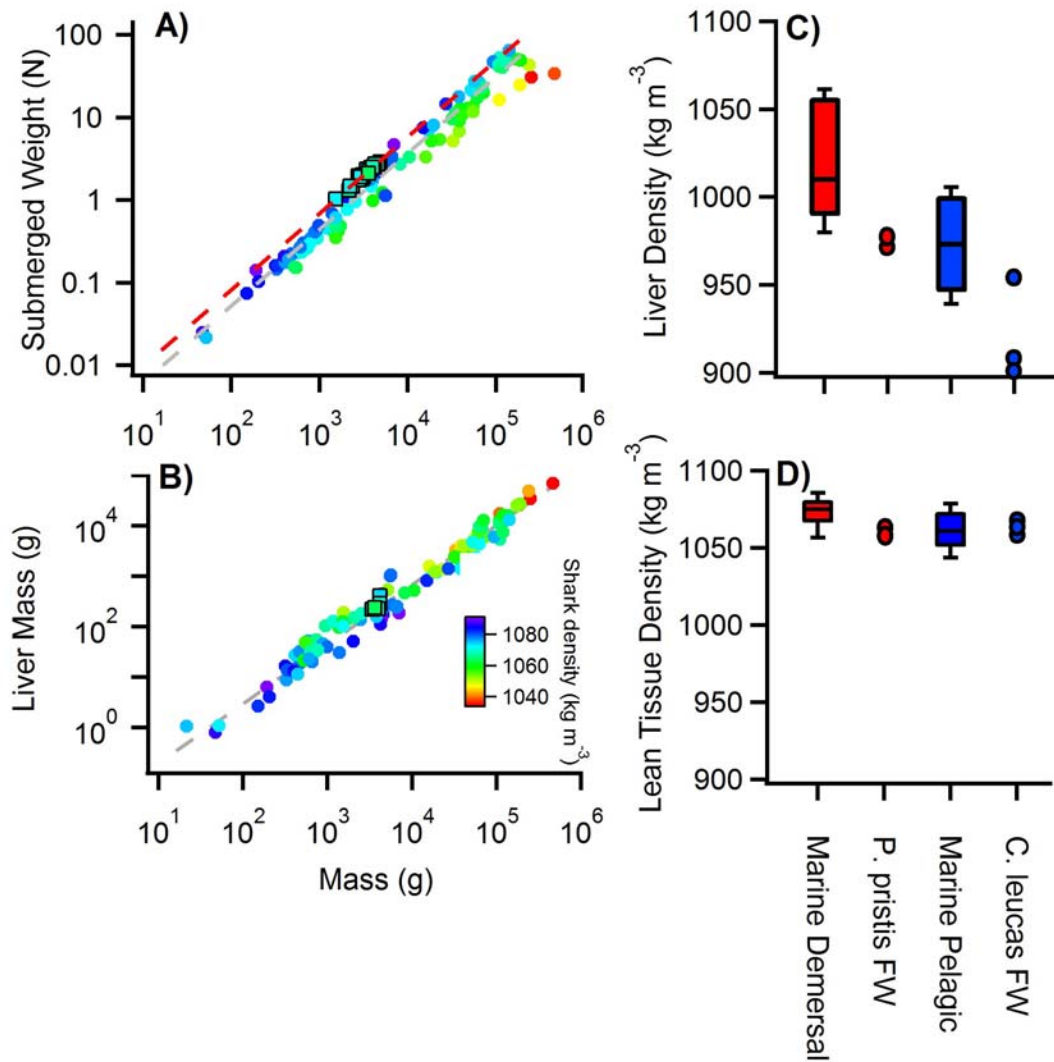

**Figure 4 Morphological differences in marine and freshwater elasmobranchs.** A) Significant differences were found in the submerged weight between all individuals sampled by Bone and Roberts (1970) and Baldrige Jr (1970) in marine waters (grey stippled line, excluding species that are neutrally buoyant, such as deep-sea sharks and the basking shark, *Cetorhinus maximus*) and *Carcharhinus leucas* (n=5) and *Pristis pristis* (n=20) sampled in freshwater as part of this study (red stippled line). B) No differences in liver size between individuals sampled in marine environments and the 2 sawfish and 3 bull sharks that were available for full necropsy. C) Comparison of liver density in the sharks sampled from marine waters and those from freshwater. The lifestyle of the species has a significant effect on liver density, with demersal individuals having denser livers than those that are pelagic. The two species we sampled in freshwater were close or below the lower 90<sup>th</sup> percentile for all marine individuals sampled previously suggesting that individuals occupying freshwater may have lower liver densities. D) No major differences in lean tissue density could be detected between either lifestyles or habitat. See Table 4 for the model selection for all three analyses.
